# Supplementary material
Source: HighWire-hosted journal article supplement (http://jpet.aspetjournals.org/highwire/filestream/151227/field_highwire_adjunct_files/2/1071_Supp_fig_3.pdf)

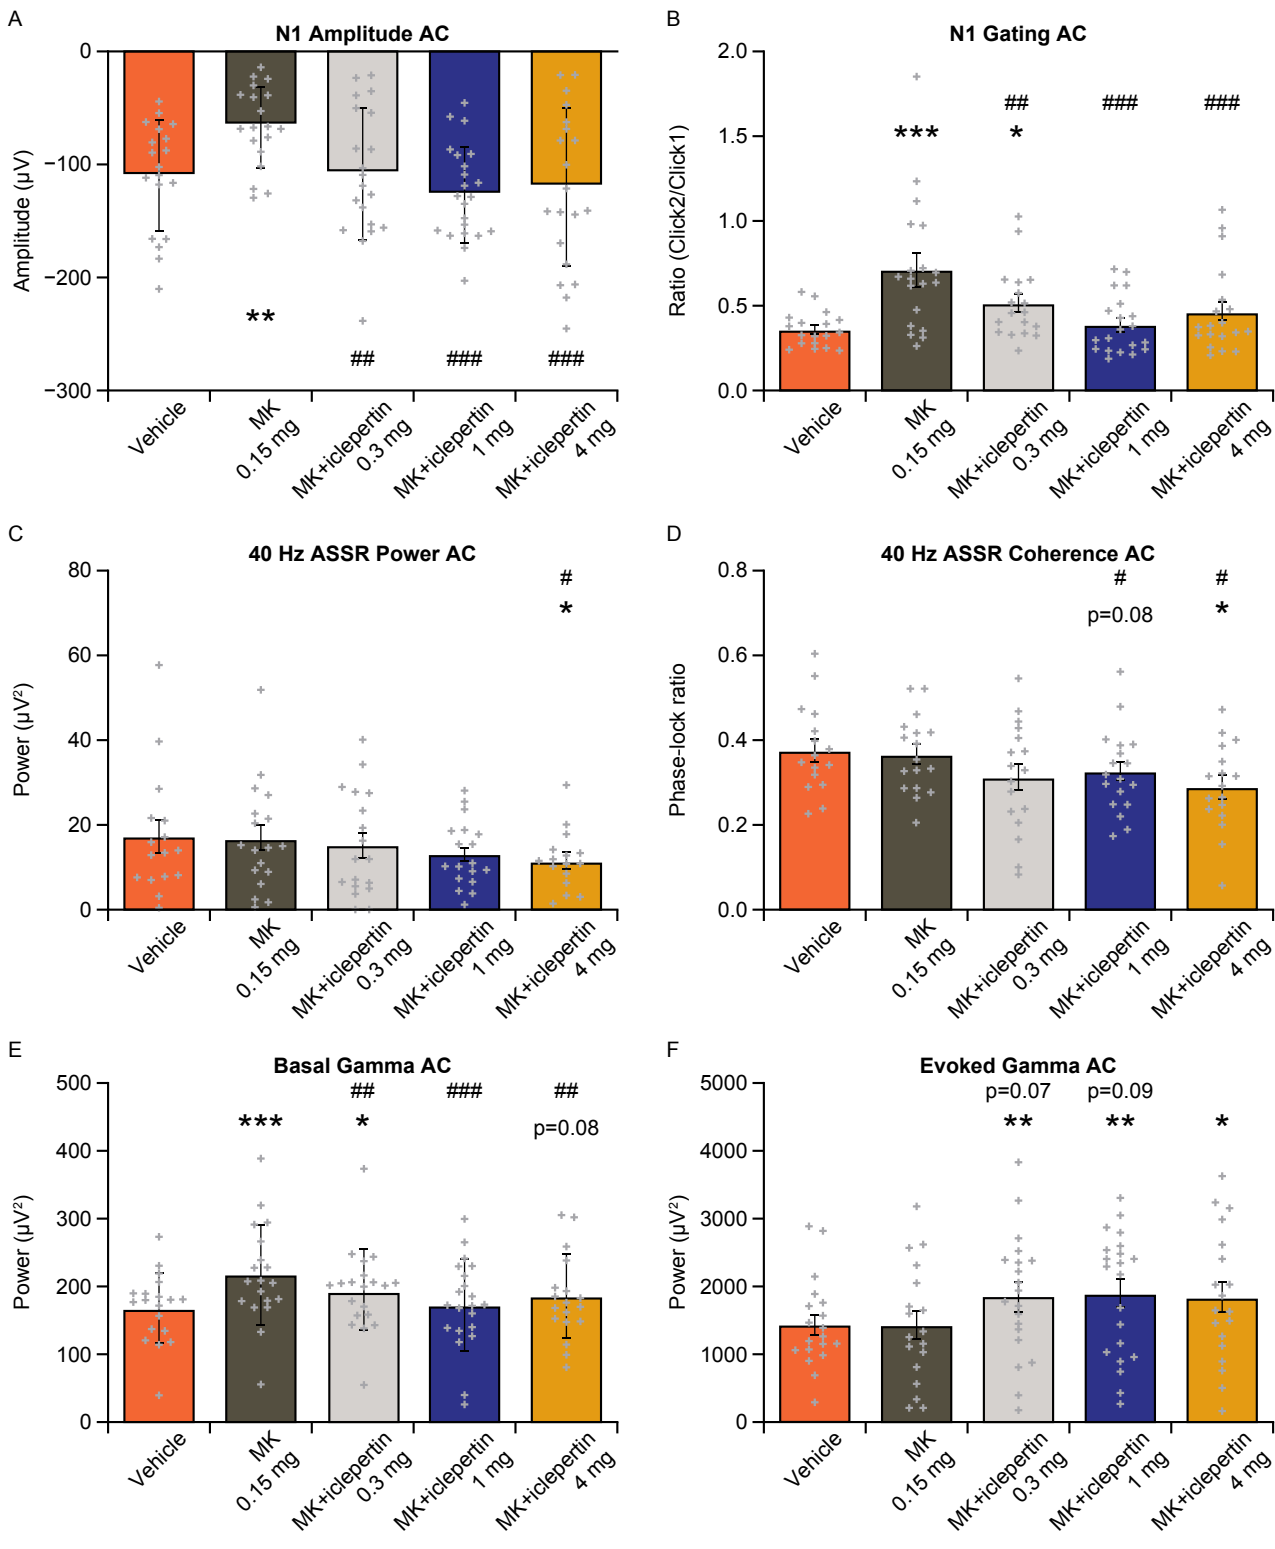

Supplement: 1071_Supp_fig_3.pdf [file 1071_Supp_fig_3.pdf]
